# Supplementary material
Source: PubMed Central journal article supplement (PMC4207089)

nature

OCTOBER 2013 VOL 7 NO 10  
www.nature.com/naturephotonics

# photonics

QUANTUM OPTICS  
teleportation

NANOPHOTONICS  
plasmonic antenna

OPTICAL PHYSICS  
attosecond probing

Light guiding  
in hydrogel *in vivo*

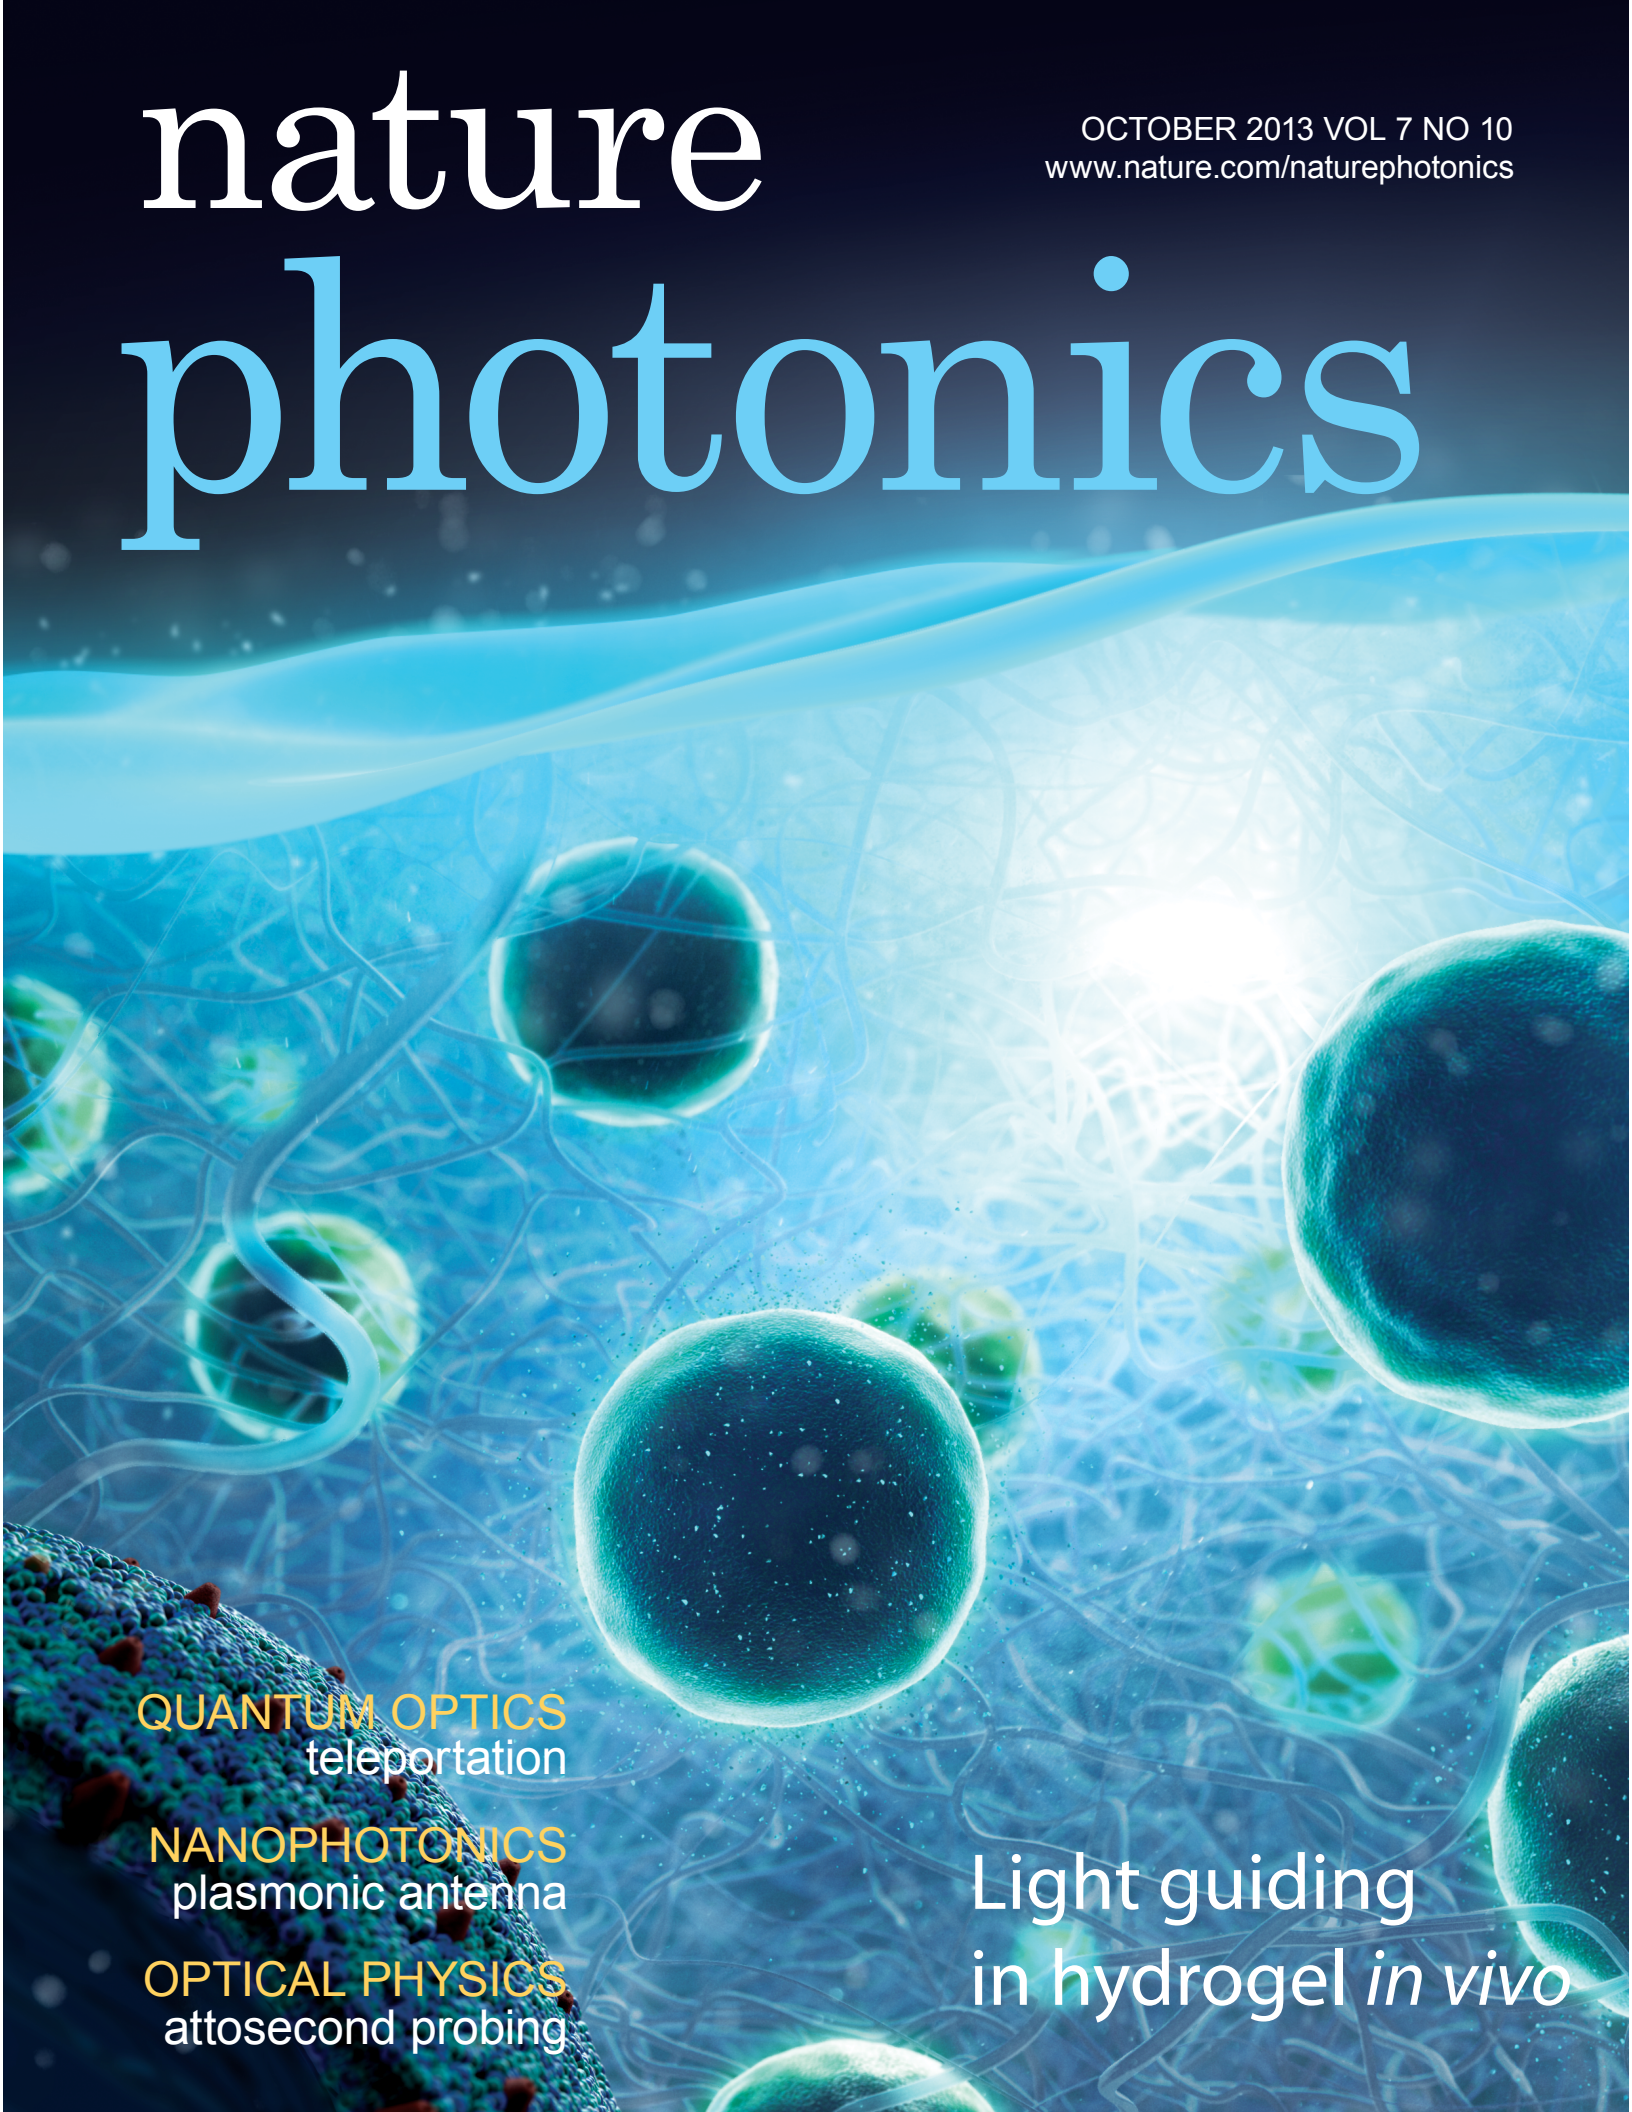

Supplement: NIHMS524708-supplement-2.pdf [file NIHMS524708-supplement-2.pdf]
