# Supplementary material
Source: PubMed Central journal article supplement (PMC4207089)
Supplement: NIHMS524708-supplement-3.pdf [file NIHMS524708-supplement-3.pdf]

nature

OCTOBER 2013 VOL 7 NO 10  
www.nature.com/naturephotonics

# photonics

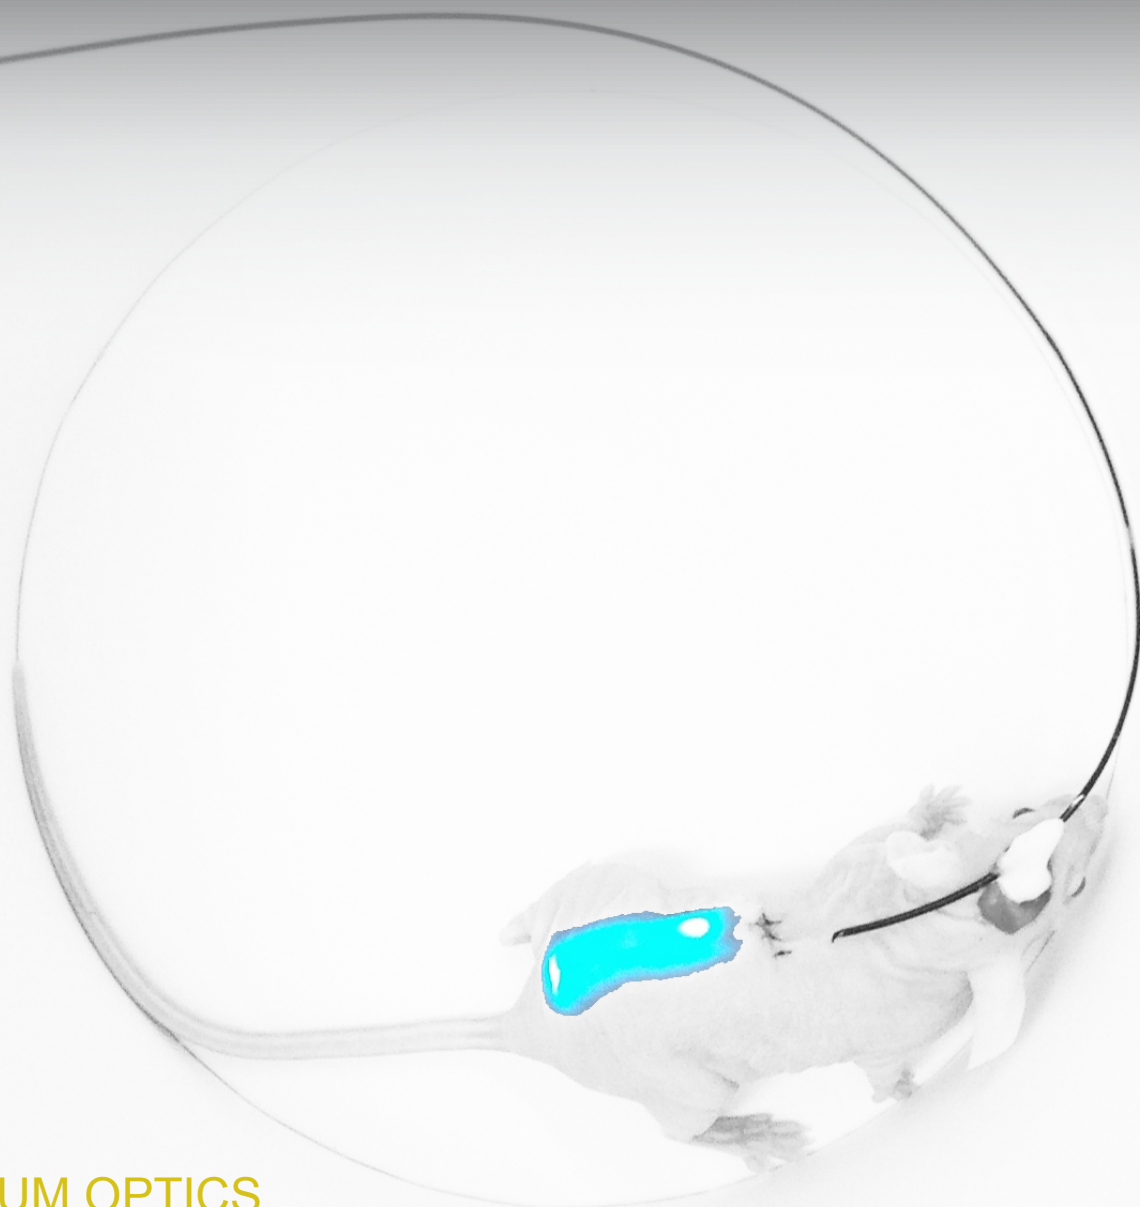

**QUANTUM OPTICS**  
teleportation

**NANOPHOTONICS**  
plasmonic antenna

**OPTICAL PHYSICS**  
attosecond probing

Light guiding  
in hydrogel *in vivo*
