# Supplementary material
Source: PubMed Central journal article supplement (PMC4207089)
Supplement: NIHMS524708-supplement-4.pdf [file NIHMS524708-supplement-4.pdf]

# nature

AUGUST 2013 VOL 7 NO 8  
www.nature.com/naturephotonics

# photonics

QUANTUM OPTICS  
teleportation

NANOPHOTONICS  
plasmonic antenna

OPTICAL PHYSICS  
attosecond probing



Light guiding  
in hydrogel *in vivo*
